# Supplementary material for: Characterization of Dysregulated lncRNA-Associated ceRNA Network Reveals Novel lncRNAs With ceRNA Activity as Epigenetic Diagnostic Biomarkers for Osteoporosis Risk
Source: Front Cell Dev Biol. 2020 Mar 31;8:184. doi: 10.3389/fcell.2020.00184 (PMC7136400; doi:10.3389/fcell.2020.00184)
Supplement: TABLE S2 — An osteoporosis-related dysregulated miRNA-mediated lncRNA-mRNA ceRNA network. [file Table_2.XLSX]

## Sheet: Sheet1
hsa-miR-34a-5p	ENSG00000155254
hsa-miR-34a-5p	ENSG00000175591
hsa-miR-34a-5p	ENSG00000258818
hsa-miR-34a-5p	ENSG00000259171
hsa-miR-34a-5p	ENSG00000071246
hsa-miR-34a-5p	ENSG00000169032
hsa-miR-34a-5p	ENSG00000171208
hsa-miR-34a-5p	ENSG00000183688
hsa-miR-34a-5p	ENSG00000225190
hsa-miR-34a-5p	ENSG00000105341
hsa-miR-34a-5p	ENSG00000198053
hsa-miR-34a-5p	ENSG00000181634
hsa-miR-340-5p	ENSG00000197780
hsa-miR-340-5p	ENSG00000149573
hsa-miR-340-5p	ENSG00000259132
hsa-miR-340-5p	ENSG00000258818
hsa-miR-340-5p	ENSG00000259171
hsa-miR-340-5p	ENSG00000171208
hsa-miR-340-5p	ENSG00000171867
hsa-miR-340-5p	ENSG00000120889
hsa-miR-574-5p	ENSG00000143630
hsa-miR-589-5p	ENSG00000071246
hsa-miR-589-5p	ENSG00000105341
hsa-miR-589-5p	ENSG00000198053
hsa-miR-589-5p	ENSG00000198113
hsa-miR-130b-3p	ENSG00000166527
hsa-miR-130b-3p	ENSG00000169032
hsa-miR-130b-3p	ENSG00000171208
hsa-miR-130b-3p	ENSG00000140968
hsa-miR-130b-3p	ENSG00000225190
hsa-miR-130b-3p	ENSG00000166401
hsa-miR-130b-3p	ENSG00000105341
hsa-miR-130b-3p	ENSG00000204103
hsa-miR-130b-3p	ENSG00000171867
hsa-miR-130b-3p	ENSG00000120889
hsa-miR-130b-3p	ENSG00000135052
hsa-miR-410-3p	ENSG00000149573
hsa-miR-410-3p	ENSG00000259132
hsa-miR-410-3p	ENSG00000171208
hsa-miR-410-3p	ENSG00000140968
hsa-miR-410-3p	ENSG00000204103
hsa-miR-410-3p	ENSG00000171867
hsa-miR-410-3p	ENSG00000120889
hsa-miR-30a-5p	ENSG00000149573
hsa-miR-30a-5p	ENSG00000166527
hsa-miR-30a-5p	ENSG00000183688
hsa-miR-30a-5p	ENSG00000120889
hsa-miR-194-5p	ENSG00000155254
hsa-miR-194-5p	ENSG00000149573
hsa-miR-194-5p	ENSG00000171208
hsa-miR-194-5p	ENSG00000135052
ENSG00000258610	ENSG00000071246
ENSG00000258610	ENSG00000105341
ENSG00000258610	ENSG00000149573
ENSG00000258610	ENSG00000181634
ENSG00000258610	ENSG00000166527
ENSG00000258610	ENSG00000175591
ENSG00000258610	ENSG00000140968
ENSG00000258610	ENSG00000259171
ENSG00000258610	ENSG00000135052
ENSG00000258610	ENSG00000198053
ENSG00000258610	ENSG00000197780
ENSG00000258610	ENSG00000204103
ENSG00000279785	ENSG00000143630
ENSG00000228290	ENSG00000071246
ENSG00000228290	ENSG00000105341
ENSG00000228290	ENSG00000183688
ENSG00000228290	ENSG00000149573
ENSG00000228290	ENSG00000181634
ENSG00000228290	ENSG00000175591
ENSG00000228290	ENSG00000140968
ENSG00000228290	ENSG00000169032
ENSG00000228290	ENSG00000198113
ENSG00000228290	ENSG00000120889
ENSG00000228290	ENSG00000171208
ENSG00000228290	ENSG00000225190
ENSG00000228290	ENSG00000171867
ENSG00000228290	ENSG00000259132
ENSG00000228290	ENSG00000197780
ENSG00000228290	ENSG00000258818
ENSG00000228290	ENSG00000204103
ENSG00000254562	ENSG00000143630
ENSG00000264108	ENSG00000183688
ENSG00000264108	ENSG00000171867
ENSG00000254432	ENSG00000143630
ENSG00000272599	ENSG00000071246
ENSG00000272599	ENSG00000105341
ENSG00000272599	ENSG00000183688
ENSG00000272599	ENSG00000149573
ENSG00000272599	ENSG00000166527
ENSG00000272599	ENSG00000140968
ENSG00000272599	ENSG00000169032
ENSG00000272599	ENSG00000155254
ENSG00000272599	ENSG00000198113
ENSG00000272599	ENSG00000135052
ENSG00000272599	ENSG00000120889
ENSG00000272599	ENSG00000171208
ENSG00000272599	ENSG00000225190
ENSG00000272599	ENSG00000171867
ENSG00000272599	ENSG00000259132
ENSG00000272599	ENSG00000198053
ENSG00000272599	ENSG00000197780
ENSG00000272599	ENSG00000258818
ENSG00000272599	ENSG00000204103
ENSG00000272599	ENSG00000166401
ENSG00000236145	ENSG00000071246
ENSG00000236145	ENSG00000105341
ENSG00000236145	ENSG00000183688
ENSG00000236145	ENSG00000149573
ENSG00000236145	ENSG00000166527
ENSG00000236145	ENSG00000140968
ENSG00000236145	ENSG00000169032
ENSG00000236145	ENSG00000155254
ENSG00000236145	ENSG00000198113
ENSG00000236145	ENSG00000259171
ENSG00000236145	ENSG00000135052
ENSG00000236145	ENSG00000171208
ENSG00000236145	ENSG00000171867
ENSG00000236145	ENSG00000259132
ENSG00000236145	ENSG00000197780
ENSG00000236145	ENSG00000258818
ENSG00000224239	ENSG00000143630
ENSG00000255084	ENSG00000143630
ENSG00000230753	ENSG00000071246
ENSG00000230753	ENSG00000105341
ENSG00000230753	ENSG00000183688
ENSG00000230753	ENSG00000149573
ENSG00000230753	ENSG00000181634
ENSG00000230753	ENSG00000166527
ENSG00000230753	ENSG00000140968
ENSG00000230753	ENSG00000169032
ENSG00000230753	ENSG00000155254
ENSG00000230753	ENSG00000198113
ENSG00000230753	ENSG00000259171
ENSG00000230753	ENSG00000135052
ENSG00000230753	ENSG00000120889
ENSG00000230753	ENSG00000171208
ENSG00000230753	ENSG00000225190
ENSG00000230753	ENSG00000171867
ENSG00000230753	ENSG00000259132
ENSG00000230753	ENSG00000198053
ENSG00000230753	ENSG00000197780
ENSG00000230753	ENSG00000258818
ENSG00000230753	ENSG00000204103
ENSG00000230753	ENSG00000166401
ENSG00000242009	ENSG00000143630
ENSG00000226649	ENSG00000143630
ENSG00000227885	ENSG00000071246
ENSG00000227885	ENSG00000105341
ENSG00000227885	ENSG00000149573
ENSG00000227885	ENSG00000259171
ENSG00000236054	ENSG00000143630
ENSG00000278990	ENSG00000143630
ENSG00000234584	ENSG00000105341
ENSG00000234584	ENSG00000183688
ENSG00000234584	ENSG00000149573
ENSG00000234584	ENSG00000140968
ENSG00000234584	ENSG00000169032
ENSG00000234584	ENSG00000155254
ENSG00000234584	ENSG00000198113
ENSG00000234584	ENSG00000135052
ENSG00000234584	ENSG00000171208
ENSG00000234584	ENSG00000225190
ENSG00000234584	ENSG00000171867
ENSG00000234584	ENSG00000259132
ENSG00000234584	ENSG00000197780
ENSG00000234584	ENSG00000258818
ENSG00000234584	ENSG00000166401
ENSG00000282164	ENSG00000071246
ENSG00000282164	ENSG00000105341
ENSG00000282164	ENSG00000183688
ENSG00000282164	ENSG00000149573
ENSG00000282164	ENSG00000166527
ENSG00000282164	ENSG00000140968
ENSG00000282164	ENSG00000169032
ENSG00000282164	ENSG00000155254
ENSG00000282164	ENSG00000198113
ENSG00000282164	ENSG00000135052
ENSG00000282164	ENSG00000120889
ENSG00000282164	ENSG00000171208
ENSG00000282164	ENSG00000225190
ENSG00000282164	ENSG00000171867
ENSG00000282164	ENSG00000259132
ENSG00000282164	ENSG00000198053
ENSG00000282164	ENSG00000197780
ENSG00000282164	ENSG00000258818
ENSG00000282164	ENSG00000204103
ENSG00000282164	ENSG00000166401
ENSG00000254092	ENSG00000143630
ENSG00000253632	ENSG00000143630
ENSG00000263470	ENSG00000071246
ENSG00000263470	ENSG00000259171
ENSG00000254746	ENSG00000143630
ENSG00000251329	ENSG00000071246
ENSG00000251329	ENSG00000105341
ENSG00000251329	ENSG00000183688
ENSG00000251329	ENSG00000149573
ENSG00000251329	ENSG00000166527
ENSG00000251329	ENSG00000140968
ENSG00000251329	ENSG00000169032
ENSG00000251329	ENSG00000135052
ENSG00000251329	ENSG00000171208
ENSG00000251329	ENSG00000171867
ENSG00000251329	ENSG00000259132
ENSG00000251329	ENSG00000197780
ENSG00000251329	ENSG00000258818
ENSG00000251329	ENSG00000166401
ENSG00000272202	ENSG00000143630
ENSG00000240591	ENSG00000071246
ENSG00000240591	ENSG00000105341
ENSG00000240591	ENSG00000149573
ENSG00000240591	ENSG00000175591
ENSG00000240591	ENSG00000198113
ENSG00000240591	ENSG00000259171
ENSG00000240591	ENSG00000204103
ENSG00000237017	ENSG00000071246
ENSG00000237017	ENSG00000105341
ENSG00000237017	ENSG00000183688
ENSG00000237017	ENSG00000149573
ENSG00000237017	ENSG00000181634
ENSG00000237017	ENSG00000166527
ENSG00000237017	ENSG00000175591
ENSG00000237017	ENSG00000140968
ENSG00000237017	ENSG00000169032
ENSG00000237017	ENSG00000155254
ENSG00000237017	ENSG00000198113
ENSG00000237017	ENSG00000259171
ENSG00000237017	ENSG00000135052
ENSG00000237017	ENSG00000120889
ENSG00000237017	ENSG00000171208
ENSG00000237017	ENSG00000225190
ENSG00000237017	ENSG00000171867
ENSG00000237017	ENSG00000198053
ENSG00000237017	ENSG00000197780
ENSG00000237017	ENSG00000258818
ENSG00000237017	ENSG00000204103
ENSG00000237017	ENSG00000166401
ENSG00000214708	ENSG00000143630
ENSG00000228705	ENSG00000143630
ENSG00000249786	ENSG00000143630
ENSG00000235823	ENSG00000143630
ENSG00000237761	ENSG00000071246
ENSG00000258623	ENSG00000143630
ENSG00000263272	ENSG00000071246
ENSG00000263272	ENSG00000105341
ENSG00000263272	ENSG00000183688
ENSG00000263272	ENSG00000149573
ENSG00000263272	ENSG00000181634
ENSG00000263272	ENSG00000166527
ENSG00000263272	ENSG00000175591
ENSG00000263272	ENSG00000140968
ENSG00000263272	ENSG00000169032
ENSG00000263272	ENSG00000155254
ENSG00000263272	ENSG00000198113
ENSG00000263272	ENSG00000259171
ENSG00000263272	ENSG00000135052
ENSG00000263272	ENSG00000120889
ENSG00000263272	ENSG00000171208
ENSG00000263272	ENSG00000225190
ENSG00000263272	ENSG00000171867
ENSG00000263272	ENSG00000259132
ENSG00000263272	ENSG00000198053
ENSG00000263272	ENSG00000197780
ENSG00000263272	ENSG00000258818
ENSG00000263272	ENSG00000204103
ENSG00000263272	ENSG00000166401
ENSG00000225233	ENSG00000143630
ENSG00000280916	ENSG00000143630
ENSG00000227617	ENSG00000071246
ENSG00000227617	ENSG00000105341
ENSG00000227617	ENSG00000259132
ENSG00000227617	ENSG00000197780
ENSG00000227617	ENSG00000258818
ENSG00000273192	ENSG00000071246
ENSG00000273192	ENSG00000105341
ENSG00000273192	ENSG00000183688
ENSG00000273192	ENSG00000149573
ENSG00000273192	ENSG00000181634
ENSG00000273192	ENSG00000175591
ENSG00000273192	ENSG00000155254
ENSG00000273192	ENSG00000259171
ENSG00000273192	ENSG00000135052
ENSG00000273192	ENSG00000198053
ENSG00000273192	ENSG00000258818
ENSG00000250706	ENSG00000143630
ENSG00000231412	ENSG00000071246
ENSG00000231412	ENSG00000105341
ENSG00000231412	ENSG00000183688
ENSG00000231412	ENSG00000149573
ENSG00000231412	ENSG00000181634
ENSG00000231412	ENSG00000166527
ENSG00000231412	ENSG00000175591
ENSG00000231412	ENSG00000140968
ENSG00000231412	ENSG00000169032
ENSG00000231412	ENSG00000155254
ENSG00000231412	ENSG00000198113
ENSG00000231412	ENSG00000135052
ENSG00000231412	ENSG00000120889
ENSG00000231412	ENSG00000171208
ENSG00000231412	ENSG00000225190
ENSG00000231412	ENSG00000171867
ENSG00000231412	ENSG00000259132
ENSG00000231412	ENSG00000198053
ENSG00000231412	ENSG00000197780
ENSG00000231412	ENSG00000258818
ENSG00000231412	ENSG00000204103
ENSG00000231412	ENSG00000166401
ENSG00000253210	ENSG00000071246
ENSG00000253210	ENSG00000105341
ENSG00000253210	ENSG00000183688
ENSG00000253210	ENSG00000149573
ENSG00000253210	ENSG00000166527
ENSG00000253210	ENSG00000140968
ENSG00000253210	ENSG00000169032
ENSG00000253210	ENSG00000155254
ENSG00000253210	ENSG00000198113
ENSG00000253210	ENSG00000135052
ENSG00000253210	ENSG00000120889
ENSG00000253210	ENSG00000171208
ENSG00000253210	ENSG00000225190
ENSG00000253210	ENSG00000171867
ENSG00000253210	ENSG00000259132
ENSG00000253210	ENSG00000197780
ENSG00000253210	ENSG00000258818
ENSG00000253210	ENSG00000204103
ENSG00000253210	ENSG00000166401
ENSG00000227338	ENSG00000143630
ENSG00000279803	ENSG00000071246
ENSG00000279803	ENSG00000105341
ENSG00000279803	ENSG00000183688
ENSG00000279803	ENSG00000149573
ENSG00000279803	ENSG00000181634
ENSG00000279803	ENSG00000166527
ENSG00000279803	ENSG00000175591
ENSG00000279803	ENSG00000140968
ENSG00000279803	ENSG00000169032
ENSG00000279803	ENSG00000155254
ENSG00000279803	ENSG00000198113
ENSG00000279803	ENSG00000259171
ENSG00000279803	ENSG00000135052
ENSG00000279803	ENSG00000120889
ENSG00000279803	ENSG00000171208
ENSG00000279803	ENSG00000225190
ENSG00000279803	ENSG00000171867
ENSG00000279803	ENSG00000259132
ENSG00000279803	ENSG00000198053
ENSG00000279803	ENSG00000197780
ENSG00000279803	ENSG00000258818
ENSG00000279803	ENSG00000204103
ENSG00000279803	ENSG00000166401
ENSG00000255471	ENSG00000071246
ENSG00000255471	ENSG00000105341
ENSG00000255471	ENSG00000149573
ENSG00000255471	ENSG00000175591
ENSG00000255471	ENSG00000259171
ENSG00000238246	ENSG00000071246
ENSG00000238246	ENSG00000105341
ENSG00000238246	ENSG00000183688
ENSG00000238246	ENSG00000149573
ENSG00000238246	ENSG00000166527
ENSG00000238246	ENSG00000140968
ENSG00000238246	ENSG00000169032
ENSG00000238246	ENSG00000155254
ENSG00000238246	ENSG00000198113
ENSG00000238246	ENSG00000135052
ENSG00000238246	ENSG00000120889
ENSG00000238246	ENSG00000171208
ENSG00000238246	ENSG00000225190
ENSG00000238246	ENSG00000171867
ENSG00000238246	ENSG00000259132
ENSG00000238246	ENSG00000198053
ENSG00000238246	ENSG00000197780
ENSG00000238246	ENSG00000258818
ENSG00000238246	ENSG00000204103
ENSG00000238246	ENSG00000166401
ENSG00000250893	ENSG00000071246
ENSG00000250893	ENSG00000175591
ENSG00000267058	ENSG00000183688
ENSG00000267058	ENSG00000225190
ENSG00000267058	ENSG00000259132
ENSG00000279048	ENSG00000071246
ENSG00000279048	ENSG00000105341
ENSG00000279048	ENSG00000183688
ENSG00000279048	ENSG00000149573
ENSG00000279048	ENSG00000181634
ENSG00000279048	ENSG00000166527
ENSG00000279048	ENSG00000140968
ENSG00000279048	ENSG00000169032
ENSG00000279048	ENSG00000155254
ENSG00000279048	ENSG00000135052
ENSG00000279048	ENSG00000120889
ENSG00000279048	ENSG00000171208
ENSG00000279048	ENSG00000171867
ENSG00000279048	ENSG00000259132
ENSG00000279048	ENSG00000197780
ENSG00000279048	ENSG00000258818
ENSG00000279048	ENSG00000204103
ENSG00000279048	ENSG00000166401
ENSG00000274265	ENSG00000105341
ENSG00000274265	ENSG00000183688
ENSG00000274265	ENSG00000259132
ENSG00000266176	ENSG00000143630
ENSG00000225751	ENSG00000143630
ENSG00000229646	ENSG00000143630
ENSG00000272009	ENSG00000143630
ENSG00000267522	ENSG00000143630
ENSG00000253825	ENSG00000259171
ENSG00000280073	ENSG00000071246
ENSG00000280073	ENSG00000105341
ENSG00000280073	ENSG00000149573
ENSG00000280073	ENSG00000181634
ENSG00000280073	ENSG00000166527
ENSG00000280073	ENSG00000140968
ENSG00000280073	ENSG00000169032
ENSG00000280073	ENSG00000259171
ENSG00000280073	ENSG00000135052
ENSG00000280073	ENSG00000171208
ENSG00000280073	ENSG00000259132
ENSG00000280073	ENSG00000197780
ENSG00000280073	ENSG00000258818
ENSG00000280073	ENSG00000204103
ENSG00000280073	ENSG00000166401
ENSG00000234535	ENSG00000143630
ENSG00000233577	ENSG00000143630
ENSG00000228528	ENSG00000143630
ENSG00000260853	ENSG00000071246
ENSG00000260853	ENSG00000105341
ENSG00000260853	ENSG00000149573
ENSG00000260853	ENSG00000181634
ENSG00000260853	ENSG00000166527
ENSG00000260853	ENSG00000140968
ENSG00000260853	ENSG00000169032
ENSG00000260853	ENSG00000259171
ENSG00000260853	ENSG00000135052
ENSG00000260853	ENSG00000120889
ENSG00000260853	ENSG00000171208
ENSG00000260853	ENSG00000259132
ENSG00000260853	ENSG00000197780
ENSG00000260853	ENSG00000258818
ENSG00000260853	ENSG00000204103
ENSG00000260853	ENSG00000166401
ENSG00000231864	ENSG00000143630
ENSG00000260671	ENSG00000143630
ENSG00000261426	ENSG00000071246
ENSG00000261426	ENSG00000181634
ENSG00000261426	ENSG00000259171
ENSG00000255187	ENSG00000071246
ENSG00000255187	ENSG00000105341
ENSG00000255187	ENSG00000183688
ENSG00000255187	ENSG00000149573
ENSG00000255187	ENSG00000181634
ENSG00000255187	ENSG00000166527
ENSG00000255187	ENSG00000175591
ENSG00000255187	ENSG00000140968
ENSG00000255187	ENSG00000169032
ENSG00000255187	ENSG00000155254
ENSG00000255187	ENSG00000198113
ENSG00000255187	ENSG00000135052
ENSG00000255187	ENSG00000120889
ENSG00000255187	ENSG00000171208
ENSG00000255187	ENSG00000225190
ENSG00000255187	ENSG00000171867
ENSG00000255187	ENSG00000259132
ENSG00000255187	ENSG00000198053
ENSG00000255187	ENSG00000197780
ENSG00000255187	ENSG00000258818
ENSG00000255187	ENSG00000204103
ENSG00000255187	ENSG00000166401
ENSG00000235890	ENSG00000071246
ENSG00000235890	ENSG00000105341
ENSG00000235890	ENSG00000149573
ENSG00000235890	ENSG00000181634
ENSG00000235890	ENSG00000135052
ENSG00000235890	ENSG00000171208
ENSG00000235890	ENSG00000197780
ENSG00000235890	ENSG00000258818
ENSG00000280710	ENSG00000143630
ENSG00000146666	ENSG00000143630
ENSG00000203496	ENSG00000143630
ENSG00000261451	ENSG00000183688
ENSG00000261451	ENSG00000166527
ENSG00000261451	ENSG00000140968
ENSG00000261451	ENSG00000169032
ENSG00000261451	ENSG00000120889
ENSG00000261451	ENSG00000225190
ENSG00000261451	ENSG00000171867
ENSG00000261451	ENSG00000259132
ENSG00000261451	ENSG00000197780
ENSG00000261451	ENSG00000258818
ENSG00000261451	ENSG00000166401
ENSG00000204025	ENSG00000143630
ENSG00000260563	ENSG00000071246
ENSG00000260563	ENSG00000105341
ENSG00000260563	ENSG00000149573
ENSG00000260563	ENSG00000181634
ENSG00000260563	ENSG00000166527
ENSG00000260563	ENSG00000175591
ENSG00000260563	ENSG00000140968
ENSG00000260563	ENSG00000169032
ENSG00000260563	ENSG00000155254
ENSG00000260563	ENSG00000198113
ENSG00000260563	ENSG00000135052
ENSG00000260563	ENSG00000120889
ENSG00000260563	ENSG00000171208
ENSG00000260563	ENSG00000225190
ENSG00000260563	ENSG00000171867
ENSG00000260563	ENSG00000259132
ENSG00000260563	ENSG00000198053
ENSG00000260563	ENSG00000197780
ENSG00000260563	ENSG00000258818
ENSG00000260563	ENSG00000204103
ENSG00000260563	ENSG00000166401
ENSG00000233907	ENSG00000143630
ENSG00000267077	ENSG00000143630
ENSG00000180458	ENSG00000143630
